# Supplementary material
Source: publisher site journal article supplement (https://www.dovepress.com/article/550127)
Supplement: Supplementary file 1 [file 550127%20Revised%20Supplementary%20Material.docx]

**Supplemental Materials**

**Statistical Power**

Post-hoc power analyses were conducted using the pwr package in R to evaluate the statistical power of the model and individual paths.1 The model power was assessed via the RMSEA-based chi-square test at a significance level of α = 0.05, while the power for each causal path was calculated based on Cohen's f² effect sizes (as a measure of the unique contribution of each path) at the same α level.

Post-hoc power analysis revealed excellent statistical power across all models. Given the sample sizes and α = 0.05, both the overall model and subgroup models (stratified by gender and relationship status) achieved power values exceeding 0.99. Furthermore, all key causal pathways directly linked to sleep quality also demonstrated high statistical power (power > 0.92).

**Phenotype Variables**

We categorized them into the following 10 classes based on the characteristics of the phenotypic variables:

**Health and Demographics:** Years of education, Income,Body mass index, Systolic blood pressure, Diastolic blood pressure, sub-maximal cardiovascular endurance, gait speed, manual dexterity, Grip strength of the dominant hand, subjective pain intensity.

**Substance Use:** Drinks consumed per drinking day in past 12 months, Frequency of any alcohol use in past 12 months, Frequency of drinking 5+ drinks in past 12 months, Frequency drunk in past 12 months, Number of AUD symptoms in the DSM4, Smoking history, Times used cocaine, Times used hallucinogens, Times used opiates, Times used sedatives, Times used stimulants, Times used marijuana, Total tobacco last 7 days, Total days used tobacco last 7 days.

**Psychiatric History:** Childhood conduct disorder, Anxious/Depressed score, Withdrawn Score, Somatic complaints score, Thought problems score, Attention problems score, Aggressive behavior score, Rule-breaking behavior score, Intrusive behavior score, Depressive problems score, Anxiety problems score, Somatic problems score, Avoidant Personality problems score, AD/H problems score, Inattention problems score, Hyperactivity problems score, Antisocial Personality problems score, Depressive symptoms.

**Cognition:** Mini Mental Status Exam, Dimensional change card sorting test score, Flanker task score, Penn progressive matrices fluid intelligence # of correct responses, Penn progressive matrices fluid intelligence # of skipped items, Penn progressive matrices fluid intelligence reaction time for correct responses, Reading English correct pronunciation, Picture sequence memory test, Pattern completion processing speed, Short Penn line orientation # correct, Short Penn line orientation reaction time, Short Penn line orientation positions off for all trials, Short Penn continuous performance sensitivity, Short Penn continuous performance specificity, Percentage of Reward Trials that received a 'larger' prediction in GAMBLING task, Median Reaction Time for Reward Trials that received a 'larger' prediction in GAMBLING task, Median Reaction Time for Reward Trials that received a 'smaller' prediction in GAMBLING task, Percentage of Punish Trials that received a 'larger' prediction in GAMBLING task, Median Reaction Time for Punish Trials that received a 'larger' prediction in GAMBLING task, Median Reaction Time for Punish Trials that received a 'smaller' prediction in GAMBLING task, Accuracy Percentage during STORY condition in LANGUAGE task, Median Reaction Time for correct trials during STORY condition in LANGUAGE task, Average difficulty level of stimuli presented during STORY condition in LANGUAGE task, Accuracy Percentage during MATH condition in LANGUAGE task, Median Reaction Time for correct trials during MATH condition in LANGUAGE task, Average difficulty level of stimuli presented during MATH condition in LANGUAGE task, Accuracy Percentage during MATCH blocks in RELATIONAL task, Median Reaction Time for correct trials during MATCH blocks in RELATIONAL task, Accuracy Percentage during RELATIONAL blocks in RELATIONAL task, Median Reaction Time for correct trials during RELATIONAL blocks in RELATIONAL task, Accuracy across all conditions in 2-back, Average of Median Reaction Time for all conditions in 2-back, Accuracy across all conditions in 0-back, Average of Median Reaction Time for all conditions in 0-back, area under the curve for $200, area under the curve for $40,000.

**Memory:** Picture sequence memory test, Penn word memory test # correct responses, Penn word memory test reaction time, Working memory list sorting.

**Emotion Recognition:** Penn Emotion Recognition # Correct Responses Median Response Time, Penn Emotion Recognition # Correct Anger Identifications, Penn Emotion Recognition # Correct Fear Identifications, Penn Emotion Recognition # Correct Happy Identifications, Penn Emotion Recognition # Correct Neutral Identifications, Penn Emotion Recognition # Correct SadIdentifications.

**Emotion:** Anger affect, Anger hostility, Anger aggression, Fear affect, Fear somatic arousal, Sadness, Life satisfaction, Meaning and purpose, Positive affect, Loneliness, Perceived hostility, Perceived stress, Self-efficacy.

**Social:** Friendship availability, Perceived rejection, Emotional support, Instrumental support, Accuracy Percentage during FACE blocks in EMOTION task, Median Reaction Time for correct trials during FACE blocks in EMOTION task, Accuracy Percentage during SHAPE blocks in EMOTION task, Median Reaction Time for correct trials during SHAPE blocks in EMOTION task, Percentage of Random stimuli that the subject rated as 'random' in SOCIAL task, Median Reaction Time for Random stimuli that the subject rated as 'random' in SOCIAL task, Percentage of Social (TOM) stimuli that received a 'social' rating in SOCIAL task, Median Reaction Time for Social (TOM) stimuli that received a 'social' rating in SOCIAL task.

**Sensory Function:** auditory perception, olfactory identification, gustatory sensitivity, Contrast Sensitivity.

**Personality (NEO-Five Factor Inventory):** Agreeableness, Openness, Conscientiousness, Neuroticism, Extraversion.

To comprehensively capture the multifactorial nature of sleep quality, we selected 122 phenotypic variables from the HCP dataset. This selection was guided by Blake et al.'s multilevel sleep composite model, which conceptualizes sleep disturbances as arising from the interplay of biological, psychological, and social mechanisms.2 To enhance conceptual clarity and alignment with contemporary psychiatric research frameworks, we integrated this model with the National Institute of Mental Health's Research Domain Criteria (RDoC).3,4 The RDoC framework provides a transdiagnostic structure for examining core dimensions of psychological and physiological functioning. Based on this integrated framework, we systematically categorized variables into multiple domains potentially associated with sleep.

Health and Demographics: This domain comprises physiological indicators (e.g., body mass index, blood pressure, cardiovascular endurance, and motor function), reflecting biological health metrics that may influence sleep architecture through metabolic, cardiovascular, and nociceptive pathways.5 It aligns with Blake et al.’s biological mechanism layer and corresponds to RDoC's Arousal/Regulatory Systems.

Substance Use: Variables assessing alcohol, tobacco, and other substance use patterns are included here. This domain captures neurochemical and circadian disruptions that perturb sleep,6 bridging Blake et al.’s biopsychological interaction layer and RDoC's Positive Valence Systems.

Psychiatric History: Comprising dimensional scores of psychopathology (e.g., anxiety, depression, somatic complaints), this domain maps onto RDoC's Negative Valence Systems and Cognitive Systems, while directly addressing Blake et al.’s emphasis on shared pathways between sleep disturbances and internalizing disorders.2

Cognition: This domain includes tasks measuring executive function, attention, and decision-making, which are processes critically modulated by sleep.2 It corresponds to Blake et al.’s psychological mechanism layer and RDoC's Cognitive Systems.

Memory: Focusing on episodic and working memory performance, this domain highlights the role of sleep in memory consolidation.2 It is a subcomponent of Blake et al.’s psychological mechanism layer and RDoC's Cognitive Systems.

Emotion Recognition: Measures of accuracy and reaction time in identifying emotional expressions operationalize RDoC's Negative Valence Systems and Social Processes. It aligns with Blake et al.'s psychological mechanisms layer, where emotional regulation and sleep may interact.2

Emotion: Self-reported measures of affective states, stress, and well-being encapsulate RDoC's Positive/Negative Valence Systems and Social Processes. This domain reflects Blake et al.'s psychological framework, emphasizing that emotional dysregulation may be a consequence of sleep disturbances.2

Social: Capturing perceived social support, rejection sensitivity, and theory-of-mind performance, this domain addresses Blake et al.’s social mechanism layer and RDoC's Social Processes, positioning social context as a critical moderator in sleep-psychopathology relationships.2

Sensory Function: Metrics of auditory, olfactory, gustatory, and visual sensitivity are included here. This domain bridges Blake et al.’s biological mechanism layer with RDoC's Cognitive Systems, as sensory processing may influence sleep through arousal modulation.2,7

Personality: Assessed using the NEO-Five Factor Inventory, this domain reflects individual differences in sleep resilience. It aligns with Blake et al.'s psychological mechanism layer and maps onto the RDoC domains of Social Processes and Cognitive Systems, highlighting the role of stable trait characteristics in regulating sleep.8

**Additional Causal Analysis**

We additionally employed three alternative causal discovery methods: Best Order Score Search (BOSS), BOSS-augmented Fast Causal Inference (BFCI), and Greedy Relaxed Sparsest Permutation (GRaSP).9,10 BOSS is a score-based method that extends the Greedy Sparsest Permutation (GSP) algorithm by searching over causal orderings to identify the optimal Bayesian network structure. BFCI replaces the FGES step in the GFCI algorithm with BOSS, yielding a more accurate Partial Ancestral Graph (PAG), particularly in the presence of latent confounders—a straightforward but effective enhancement. GRaSP generalizes several permutation-based algorithms, including GSP, TSP (Triangular Causal Sorting), and ESP. Specifically, GSP can be viewed as a bounded, iterative variant of TSP, while ESP expands the search space beyond GSP. GRaSP unifies these approaches through parameterization, allowing each to be recovered as a special case. Moreover, by selecting broader parameterizations, GRaSP can further extend the search space beyond ESP, improving accuracy in causal structure recovery.

The results of these three algorithms all indicate that negative affect, somaticism, and delay discounting are the three factors that are directly linked to sleep quality.


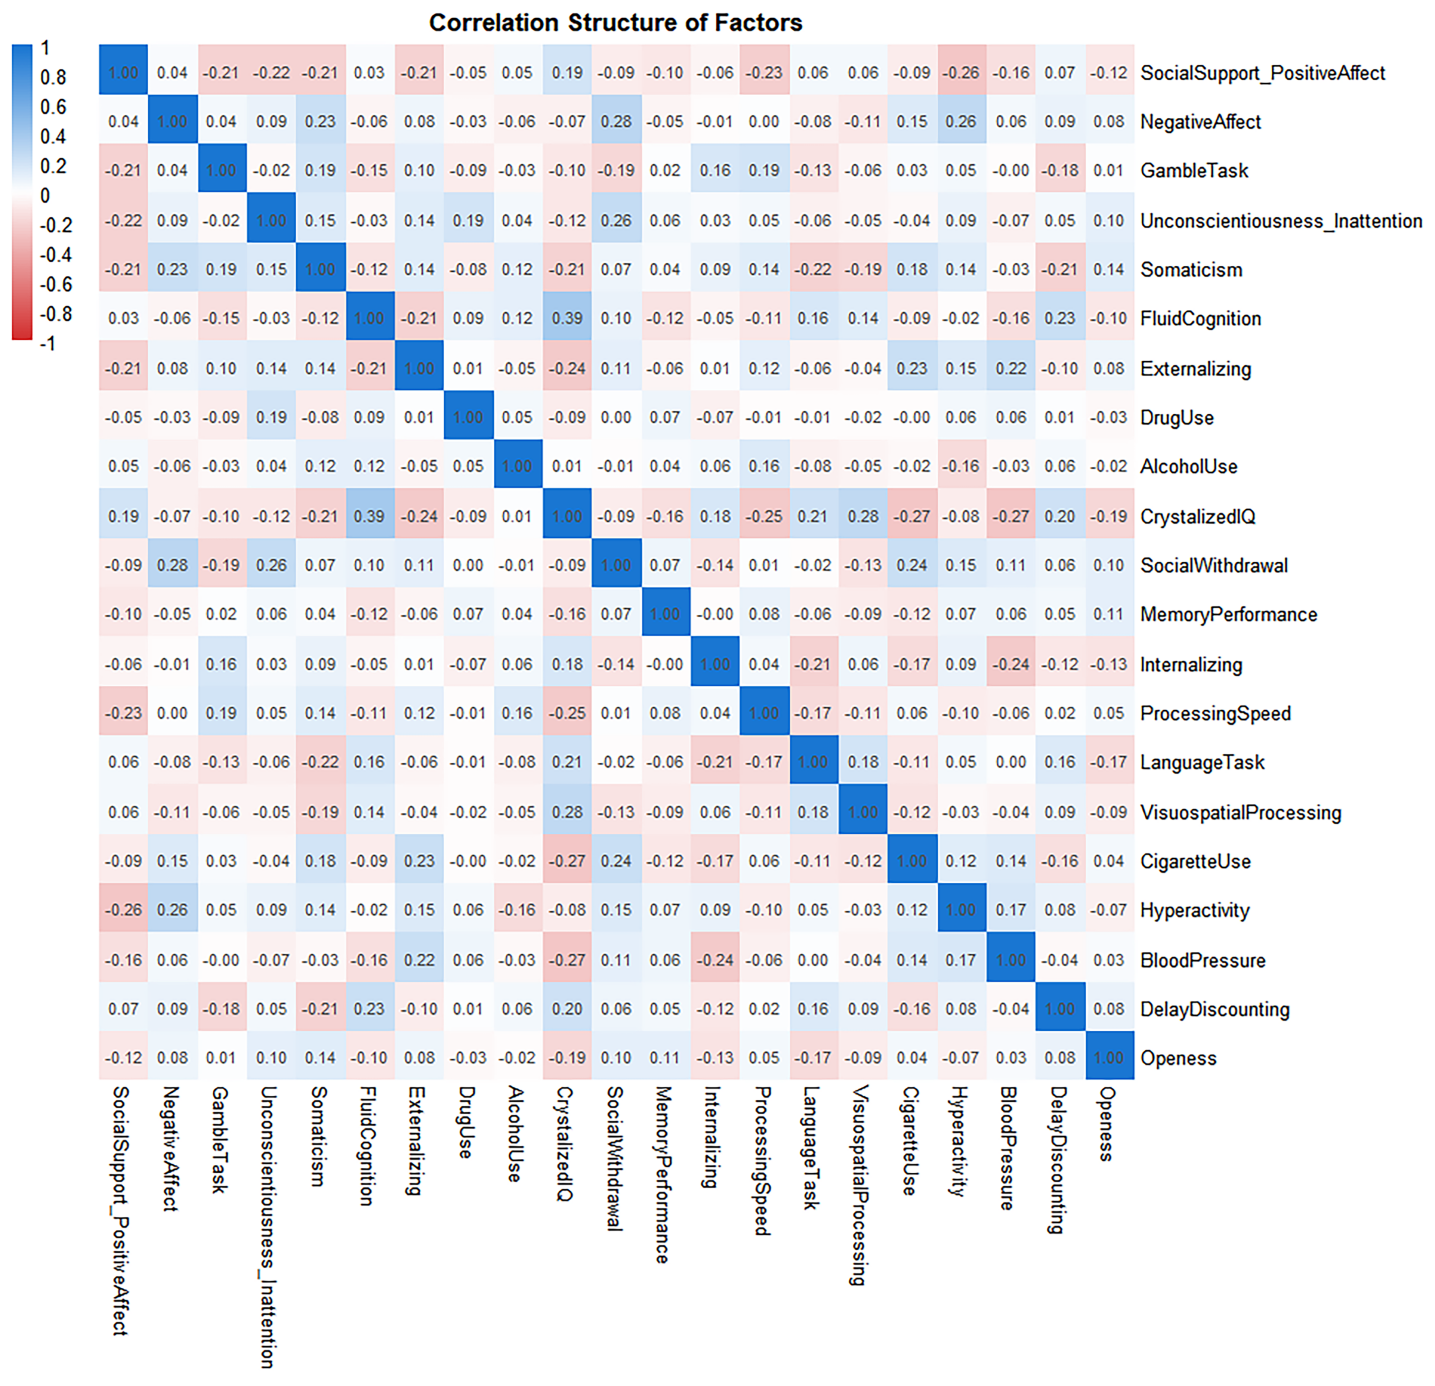


Figure S1: Correlation structure of factors.

Figure S2: Stability analysis results for the full subjects.

Figure S3: Stability analysis results for the males.

Figure S4: Stability analysis results for the females.

Figure S5: Stability analysis results for the unmarried/non-cohabiting.

Figure S6: Stability analysis results for the married/cohabiting.

**References**

1. Champely S, Ekstrom C, Dalgaard P, et al. pwr: Basic functions for power analysis. 2017;

2. Blake MJ, Trinder JA, Allen NB. Mechanisms underlying the association between insomnia, anxiety, and depression in adolescence: Implications for behavioral sleep interventions. *Clin Psychol Rev*. Jul 2018;63:25-40. doi:10.1016/j.cpr.2018.05.006

3. Cuthbert BN, Insel TR. Toward the future of psychiatric diagnosis: the seven pillars of RDoC. *BMC Med*. May 14 2013;11:126. doi:10.1186/1741-7015-11-126

4. Cuthbert BN, Kozak MJ. Constructing constructs for psychopathology: the NIMH research domain criteria. *J Abnorm Psychol*. Aug 2013;122(3):928-37. doi:10.1037/a0034028

5. Singh R, Saini H, Sah NK. Sleep attenuates body mass index, cardiorespiratory fitness, and its effect on blood pressure in young adolescents: The cross-sectional lifestyle, biomarkers, and early risk of hypertension. *National Journal of Physiology, Pharmacy and Pharmacology*. 2022;12(12):2099-2099.

6. Sharma P, Nelson RJ. Disrupted Circadian Rhythms and Substance Use Disorders: A Narrative Review. *Clocks &amp; Sleep*. 2024;6(3):446-467.

7. Engel-Yeger B, Shochat T. The relationship between sensory processing patterns and sleep quality in healthy adults. *Canadian Journal of Occupational Therapy*. 2012;79(3):134-141.

8. Hintsanen M, Puttonen S, Smith K, et al. Five-factor personality traits and sleep: evidence from two population-based cohort studies. *Health Psychol*. Oct 2014;33(10):1214-23. doi:10.1037/hea0000105

9. Andrews B, Ramsey J, Sánchez-Romero R, Camchong J, Kummerfeld E. Fast Scalable and Accurate Discovery of DAGs Using the Best Order Score Search and Grow-Shrink Trees. *Adv Neural Inf Process Syst*. Dec 2023;36:63945-63956.

10. Solus L, Wang Y, Uhler C. Consistency guarantees for greedy permutation-based causal inference algorithms. *Biometrika*. 2021;108(4):795-814.
